1 **Dietary modulation alters susceptibility to *Listeria monocytogenes* and**  
2 ***Salmonella typhimurium* in a gut microbiota-independent manner**

3

4 Mathis Wolter<sup>a,b</sup>, Alex Steimle<sup>a</sup>, Jacques Zimmer<sup>a</sup>, and Mahesh S. Desai<sup>a,c,#</sup>

5

6 *<sup>a</sup>Department of Infection and Immunity, Luxembourg Institute of Health, Esch-sur-Alzette,*  
7 *Luxembourg*

8 *<sup>b</sup>Faculty of Science, Technology and Medicine, University of Luxembourg, Esch-sur-Alzette,*  
9 *Luxembourg*

10 *<sup>c</sup>Odense Research Center for Anaphylaxis, Department of Dermatology and Allergy Center, Odense*  
11 *University Hospital, University of Southern Denmark, Odense, Denmark*

12

13 Running title: Fiber deprivation alters food pathogen susceptibility

14

15 <sup>#</sup>Corresponding author: Mahesh S. Desai, [mahesh.desai@lih.lu](mailto:mahesh.desai@lih.lu)

16

17 Manuscript format: *OBSERVATION*

18 **Abstract**

19 Food safety has considerably improved worldwide, yet infections with food-borne human enteric  
20 pathogens, such as *Listeria* spp. and *Salmonella* spp., still cause numerous hospitalizations and  
21 fatalities. Thus, the need to shed more light on the mechanisms of enteropathogenesis is apparent.  
22 Since dietary alterations, including fiber deficiency, might impact the colonization resistance by the  
23 gut microbiota, studying diet–microbiota–pathogen axis holds promise in further understanding the  
24 pathogenesis mechanisms. Using a gnotobiotic mouse model containing a 14-member synthetic  
25 human gut microbiota (14SM), we have previously shown that dietary fiber deprivation promotes  
26 proliferation of mucin-degrading bacteria leading to a microbiota-mediated erosion of the colonic  
27 mucus barrier, which results in an increased susceptibility towards the rodent enteric pathogen  
28 *Citrobacter rodentium*. Here, we sought to understand how low-fiber diet affects susceptibility to  
29 *Listeria monocytogenes* and *Salmonella typhimurium* infections in our 14SM gnotobiotic mouse  
30 model, in BALB/c and C57BL/6N backgrounds, respectively. Intriguingly and in contrast to our  
31 results with *C. rodentium*, we observe that depriving mice of dietary fiber protected them from  
32 infections with the pathogens compared to mice fed a standard chow. The microbiota delayed the  
33 overall pathogenicity as compared to the onset of disease observed in germ-free control mice;  
34 nevertheless, we observe the same effect of diet in germ-free mice, suggesting that the susceptibility  
35 is microbiota independent. Our study points out an important observation that dietary fiber plays a  
36 crucial role on either the host susceptibility, the virulence of these pathogens, or both, which would  
37 be judicious to design and interpret future studies.

38

39

40

41

42

43 **Importance**

44 Human enteric pathogens *Listeria monocytogenes* and *Salmonella typhimurium* are employed as  
45 classical models in rodent hosts to understand the pathogenesis mechanisms of food-borne pathogens.  
46 Research in the past decade has stressed importance of the composition of the gut microbiota in  
47 modulating susceptibility to these pathogens. Our results—using gnotobiotic mice and germ-free  
48 control animals—additionally suggest that the dietary fiber components dominate the impact of  
49 enteropathogenic virulence over the pathogenicity-modulating properties of the gut microbiota. The  
50 significance of our research is in the need to carefully choose a certain chow when performing the  
51 enteropathogen-associated mouse experiments and to cautiously match the rodent diets when trying  
52 to replicate experiments across different laboratories. Finally, our data underscore the importance of  
53 germ-free control animals to study these pathogens, as our findings would have been prone to  
54 misinterpretation in the absence of these controls.

55 **Main text**

56 The gut microbiota confers colonization resistance against invading pathogens by nutrient  
57 competition, and by maintaining the host immune homeostasis and the mucosal barrier integrity (1).  
58 Deficiency of dietary fiber might negatively affect these host-beneficial properties of the microbiome  
59 (2). Since dietary fiber consumption in Western countries is below the recommended intake of 25–  
60 35 g per day (3), such dietary habits might contribute to the observed incidence of enteric pathogen  
61 infections in the Western world. Using a well-characterized 14-member synthetic human gut  
62 microbiome (14SM) in gnotobiotic mice, we have previously demonstrated that dietary fiber  
63 deprivation leads to an increase in the mucin-degrading gut microbiome, which erodes the colonic  
64 mucus barrier (4). We further showed that the reduced mucus barrier enhances susceptibility to  
65 infection with *Citrobacter rodentium* (4), a rodent pathogen used to model human enteropathogenic  
66 and enterohaemorrhagic *E. coli* infections (5). Since the intestinal mucus barrier is a first line of innate  
67 defense (1), here, we hypothesized that the diet-induced mucus erosion might also increase  
68 susceptibility to other enteric pathogens.

69 Food safety has increased considerably in recent years, yet food-borne enteric pathogens such  
70 as *Listeria* spp. and *Salmonella* spp. remain a major source of disease, even in industrialized countries  
71 (6, 7). Since dietary alterations, including fiber deficiency, might alter colonization resistance by the  
72 gut microbiota to enteric pathogens (1), understanding the interconnections in the diet–microbiota–  
73 pathogen axis might help to shed light on hitherto unexplored pathogenesis mechanisms. It has  
74 previously been shown that mice lacking the *Muc2* gene, which encodes for the major constituent  
75 glycoprotein of the colonic mucus layer, are more susceptible towards *L. monocytogenes* and *S.*  
76 *typhimurium* and infection (8, 9). Notably, a similar increase in susceptibility was observed for *C.*  
77 *rodentium* in *Muc2*<sup>-/-</sup> mice (10), a result that we could recapitulate in wild-type, fiber-deprived mice  
78 with the reduced mucus barrier (4). Thus, we leveraged our 14SM gnotobiotic model to investigate

79 how dietary fiber deprivation and/or eroded mucus barrier affect the host susceptibility towards  
80 infections with the intracellular enteric pathogens *L. monocytogenes* and *S. typhimurium*.

81 For this purpose, we employed BALB/c and C57BL/6 mouse strains for infections with *L.*  
82 *monocytogenes* and *S. typhimurium*, respectively; the choice of the host strains for the respective  
83 pathogens is based on the preference of the specific pathogens for the strains, as shown by previous  
84 studies (11–14). We colonized the 6–10 weeks old, germ-free (GF) mice with the 14SM community  
85 and confirmed colonization of all 14 strains by qPCR using strain-specific primers as described  
86 previously (4, 15). For six days after colonization, the mice were kept on a standard mouse chow,  
87 which we call fiber-rich (FR) diet. After six days, half of the mice were switched to a fiber-free (FF)  
88 diet. After an additional 20 days, BALB/c mice were infected via intragastric gavage with  $10^9$  colony-  
89 forming units (CFU) of *L. monocytogenes* and C57BL/6 mice were infected with  $10^8$  CFU of *S.*  
90 *typhimurium*. Disease progression after infection was monitored for up to 10 days (**Fig. 1A, upper**  
91 **mouse groups**). Age- and sex-matched GF BALB/c and C57BL/6 mice were used as controls and  
92 also fed either FR- or FF-diets before being subjected to *L. monocytogenes* and *S. typhimurium*  
93 infection (**Fig. 1A, lower mouse groups**).

94 Throughout the feeding period before the pathogen infection, neither FR- nor FF-fed mice  
95 exhibited any obvious physiological abnormalities, irrespective of whether they were 14SM-  
96 colonized or not. In line with our previously published study with Swiss Webster mice hosting our  
97 14SM community (4), fiber deprivation significantly shifted the gut microbiota of both BALB/c and  
98 C57BL/6 mice towards an increased relative abundance of the mucin-degrading bacteria  
99 *Akkermansia muciniphila* and *Bacteroides caccae* (**Fig. 1B**). Whereas, the relative abundance of the  
100 typical fiber-degrading strains *Bacteroides ovatus*, *Eubacterium rectale* and *Roseburia intestinalis*  
101 decreased significantly in FF-fed mice of both genotypes compared to 14SM-colonized mice on the  
102 FR diet (**Fig. 1B**). In contrast to *C. rodentium*, the primary infection site of these intracellular  
103 pathogens is in the small intestine and not the colon, yet previously it was shown that Muc2-

104 deficiency renders colon as the main site for establishing a systemic spread of *L. monocytogenes* (8).  
105 Accordingly, the expansion of mucin-degrading commensals in FF-fed mice (**Fig. 1C**) prompted us  
106 to investigate the activity of bacterial mucin-glycan degrading enzymes, which would be a proxy for  
107 the erosion of the mucus barrier. We detected significantly increased fecal activities of key mucin  
108 glycan-degrading bacterial enzymes, such as sulfatase (SULF),  $\alpha$ -fucosidase (FUC) and  $\beta$ -N-acetyl-  
109 glucosaminidase (NAG) in FF-fed BALB/c mice compared to FR-fed mice (**Fig. 1D**). In C57BL/6  
110 mice, only NAG was significantly increased while SULF and FUC showed a non-significant trend  
111 (**Fig. 1D**). Moreover, the activity of  $\beta$ -glucosidase (GLU)—an enzyme that indicates microbial plant  
112 fiber metabolism—did exhibit significant changes in BALB/c mice and significantly decreased in  
113 FF-fed C57BL/6 mice (**Fig. 1D**). Overall, our results show an increased activity of the carbohydrate-  
114 active enzymes during fiber deprivation is specific to mucin glycan-degrading enzymes (**Fig. 1D**).

115         These results indicate a diet-induced impairment of the colonic mucus layer, thereby  
116 increasing interactions between host cells and the intestinal microbiome. Thus, we determined  
117 potential diet-induced colonic inflammation via detection of fecal lipocalin-2 (LCN-2) levels, which  
118 is considered as a biomarker for low-grade inflammation (16). In BALB/c mice, we detected  
119 significantly increased levels of LCN-2 in both, FR-fed GF and FR-fed 14SM-colonized mice,  
120 compared to their FF-fed counterparts, while we did not detect any differences in C57BL/6 mice (**Fig.**  
121 **1E**). In contrast, in our previous study, 14SM-colonized Swiss-Webster mice show increased LCN-2  
122 levels on the FF diet (4), suggesting that dietary fiber-mediated colonic baseline inflammation is  
123 likely dependent on the rodent genetic background. Furthermore, at least in BALB/c and C57BL/6  
124 mice, this baseline inflammation is largely independent of the presence of the microbiota, as the  
125 observed trends were similar in GF mice (**Fig. 1E**). Interestingly, we observe differences in the  
126 relative abundances of 14 strains in BALB/c, C57BL/6 (**Fig. 1B**) and Swiss Webster mice (4), despite  
127 being fed an identical FR diet, which indicates that the host genetic background plays a role in the  
128 colonization of our 14 strains.

129           After a 20-day feeding period, we infected both mouse strains with their respective pathogens  
130 **(Fig. 1A)**. Body weight and disease scores of all mouse groups were assessed daily for up to 10 days  
131 post infection (dpi). Lethality of *L. monocytogenes*-infected GF FR-fed BALB/c mice reached 100%  
132 by 4 dpi, while their FF-fed counterpart provided a significantly higher survival rate **(Fig. 2A, left**  
133 **panel)**. Similarly, 14SM-colonized FF-fed BALB/c mice had a significantly higher survival rate than  
134 their FR counterpart and intriguingly, all 14SM-colonized FF-fed animals survived the infection **(Fig.**  
135 **2A, left panel)**. In accordance with previous reports stating that mice harboring an intestinal  
136 microbiota are less susceptible to *L. monocytogenes* infections than GF mice (11), 14SM-colonized  
137 BALB/c mice generally provided increased survival compared to the GF controls fed the same diet  
138 **(Fig. 2A, left panel)**. In line with the course of the survival curves, weight loss in FR-fed and *L.*  
139 *monocytogenes*-infected BALB/c mice, either 14SM-colonized or GF, was significantly higher  
140 compared to the corresponding FF-fed groups **(Fig. 2B, left panel)**. Additionally, daily-assessed  
141 disease scores in all four *L. monocytogenes*-infected BALB/c mouse groups **(Fig. 2C, left panel; see**  
142 **Table 1** for disease scoring scheme) underscore that susceptibility to *L. monocytogenes* infection is  
143 more dependent on the fiber content of the diet itself than on presence of a microbiota or its diet-  
144 influenced composition. Interestingly, fecal *L. monocytogenes* load did not significantly differ  
145 between both diets of the GF and 14SM groups, except for the last time point in the 14SM group  
146 which hints at a faster clearance in 14SM FR-fed mice **(Fig. 2D)**. Systemic dissemination of *L.*  
147 *monocytogenes* in BALB/c mice was assessed by detection of CFUs in liver and spleen **(Fig. 2E)**. In  
148 contrast to the fecal pathogen levels, both FR-fed groups showed significantly increased  
149 dissemination of *L. monocytogenes* into liver compared to their FF-fed counterparts **(Fig. 2E, upper**  
150 **left panel)**. Similarly, dissemination into spleen was significantly higher in GF FR-fed mice  
151 compared to FF-fed controls **(Fig. 2E, lower left panel)**. These results suggest that the fiber-free diet  
152 does not affect growth of *L. monocytogenes*, but hinders its translocation across the epithelium.

153 In contrast to *L. monocytogenes*-infected BALB/c mice, all *S. typhimurium*-infected C57BL/6  
154 mice died within 4 days after infection (**Fig. 2A, right panel**). Nevertheless, there were no significant  
155 differences in survival rates between FR-fed and FF-fed GF mice as well as between 14SM-colonized  
156 mice fed the two different diets (**Fig. 2A, right panel**). Despite no significant differences in survival  
157 between *S. typhimurium*-infected C57BL/6 mice fed different diets, weight loss in FR-fed 14SM-  
158 colonized, as well as in FR-fed GF C57BL/6 mice, was significantly increased compared to their FF-  
159 fed 14-SM colonized or GF mice (**Fig. 2B, right panel**). Disease scores of all mice reached the  
160 maximum possible score of 6, requiring immediate euthanasia, by 4 dpi (**Fig. 2C, right panel**).  
161 Notably, GF mice were more susceptible to *S. typhimurium* infection than 14SM- colonized mice and  
162 FR-fed 14SM mice provided significantly higher disease scores than FF-fed 14SM-colonized mice.  
163 Furthermore, we detected no significant differences in dissemination of *S. typhimurium* into liver  
164 between both GF groups; in 14SM-colonized mice, FR-fed animals provided higher *S. typhimurium*  
165 CFUs in liver compared to FF-fed mice (**Fig. 2E, upper right panel**). In spleen, however, no  
166 significant differences in CFUs were observed when comparing the diets of 14SM-colonized or GF  
167 mice (**Fig. 2E, lower right panel**).

168 These results suggest that dietary fiber deprivation has a protective effect against the  
169 intracellular, food-borne pathogens *L. monocytogenes* and *S. typhimurium*, whose preferable  
170 infection site is the small intestine (12, 17). Our data suggest that this effect is microbiome  
171 independent and is more pronounced in BALB/c mice infected with *L. monocytogenes* compared to  
172 C57BL/6 mice infected with *S. typhimurium*. In contrast to Swiss Webster mice infected with cecum-  
173 and colon-targeting *C. rodentium* (4), elevated mucin degradation in BALB/c and C57BL/6 mice, as  
174 consequence of fiber deprivation, did not promote susceptibility to the chosen enteropathogens.  
175 Overall, we determined a direct impact of dietary fiber components on host susceptibility to  
176 enteropathogenic infections, which seems to be rooted in a heightened translocation efficiency. This  
177 cannot be counteracted by pathogenicity-modulating properties in 14SM-colonized mice, although



178 the microbiota delayed the overall disease course and pathogen load. Our data suggest a potential pre-  
179 priming of the host in response to dietary fiber, which potentially facilitates subsequent pathogen  
180 infection. However, we cannot exclude the possibility that the fiber types present in our FR diets  
181 promote pathogen virulence, which cannot be counteracted by the 14SM microbiota. Indeed, a study  
182 in guinea pigs showed that supplementation with the dietary fibers pectin and inulin significantly  
183 increased the translocation of *L. monocytogenes* into liver and spleen (18). However, this study also  
184 shows that supplementation with galactooligosaccharides and xylooligosaccharides decreased the  
185 translocation (18), indicating a fiber-source specific virulence modulator of *L. monocytogenes*. In this  
186 context, increased fiber consumption has previously been linked to both, increased and decreased,  
187 susceptibility (13, 19, 20) to *S. typhimurium* infections, indicating that not only the presence or  
188 absence of dietary fiber in a mouse chow determines enteropathogen susceptibility, but the source or  
189 type of fiber is also an essential factor. Despite many advantages of gnotobiotic mouse studies (21),  
190 the potential absence of interactions between specific commensal bacteria and pathogens such as  
191 *Prevotella* spp. with *L. monocytogenes* (14) or *Mucispirillum shadleri* with *S. typhimurium* (22) must  
192 be considered as a limitation of our 14SM model. Moreover, gnotobiotic models might fail to provide  
193 a real-life picture of colonization resistance provided by a complex microbiome against both *L.*  
194 *monocytogenes* and *S. typhimurium* infections (11, 12). A potential caveat in comparing results  
195 obtained from our FR and FF diets could be the higher amount of simple sugar in the FF diet (4).

196 The intriguing impact of dietary fiber on increased susceptibility to enteropathogenic  
197 infections in mice, that is independent of the gut microbiota, calls attention to giving due importance  
198 when designing diets in mouse studies. Thus, mouse studies investigating underlying mechanisms of  
199 enteropathogen infections should involve a critical assessment of the animal chow composition across  
200 different laboratories. Our observation might have been overlooked in the absence of GF control  
201 groups, highlighting the importance of such controls when studying the enteropathogenesis  
202 mechanisms. At a broader level, our observational study suggests that potential dietary modulations

203 via fiber supplementation for the benefit of human health should be performed carefully, considering  
204 the underlying microbiota composition and acknowledging potential downfalls due to unexpected  
205 side effects.

## 206 **Materials and Methods**

207 **Ethical statement.** All animal experiments were performed according to the “*Règlement Grand-*  
208 *Ducal du 11 janvier 2013 relatif à la protection des animaux utilisés à des fins scientifiques*” based  
209 on the Directive 2010/63/EU on the protection of animals used for scientific purposes and approved  
210 by the Animal Experimentation Ethics Committee of the University of Luxembourg and by the  
211 Luxembourgish Ministry of Agriculture, Viticulture and Rural Development (national authorization  
212 number: LUPA 2020/27). The mice were housed in isocages under gnotobiotic conditions in  
213 accordance with the recommendations stated by the Federation of European Laboratory Animal  
214 Science Association (FELASA).

215 **Experimental design and dietary treatment.** Six to ten weeks old, age-matched male germ-free  
216 (GF) BALB/c (n=20, 5 per group) and C57BL/6N (n=31, GF Fiber-rich (FR) group: 7 per group,  
217 other groups: 8 per group) were housed in isocages with up to five animals per cage. Light cycles  
218 consisted of 12 hours of light and sterile water and diets were provided ad libitum. The GF status of  
219 the mice was confirmed by aerobic and anaerobic microbial culturing of fecal samples. As per the  
220 groupings, the relevant mice were gavaged with 0.2 ml of a 14-member synthetic human gut  
221 microbiota (14SM) gavage mix on two consecutive days. The gavage mix was prepared as described  
222 previously (15). Before and six days following the gavage, all mice were maintained on a standard  
223 mouse chow which we refer to as fiber-rich (FR) diet. Afterwards half of the gavaged and half of the  
224 GF mice were switched randomly to a fiber-free (FF) diet while the rest were maintained on the FR  
225 diet. In contrast to the FR diet, the FF diet does not contain dietary fiber from plant sources, but  
226 instead contains increased glucose levels (4). All mice were maintained for 20 days on their respective  
227 diet while fecal samples were collected once a week. After this 20-day feeding period, the BALB/c  
228 mice were infected with *L. monocytogenes* and the C57BL/6N mice were infected with *S.*  
229 *typhimurium*. Following the infection, the mice were observed for up to 10 days on their respective  
230 diets and fecal samples were collected daily for all possible mice. Upon reaching the humane endpoint

231 or the end of the 10 days observation time, mice were euthanized by cervical dislocation. Liver and  
232 spleen were collected to determine pathogen load and spleen weight. Cecal contents were flash frozen  
233 and stored at -80 °C for LCN-2 level measurements (see below). Due to the rapid disease  
234 development, it was not possible to reliably obtain fecal material during the course of the *S.*  
235 *typhimurium* infection due to the severe symptoms, as such we could not compare CFU counts from  
236 feces between these groups.

237 **Animal diets.** The fiber-rich diet was an autoclaved rodent chow (LabDiet, 5013), while the fiber-  
238 free diet was manufactured and irradiated by SAFE diets (Augy, France) according to the modified  
239 Harlan.TD08810 diet described previously (4).

240 **Colonization with 14-member synthetic microbiota (14SM).** All 14SM-constituent strains were  
241 cultured and intra-gastrically gavaged as described previously (15).

242 **Quantification of bacterial relative abundance.** The colonization of individual strains in the 14-  
243 member synthetic microbiota was confirmed using phylotype-specific qPCR primers as described  
244 previously (15), and the relative abundances of individual microbial strains were computed using the  
245 same qPCR protocol (15).

246 **Pathogen culturing and enumeration.** Both *Listeria monocytogenes* (Murray et al.) Pirie (ATCC®  
247 BAA-679™) and *Salmonella enterica* subsp. *enterica* (ex Kauffmann and Edwards) Le Minor and  
248 Popoff serovar Typhimurium (Strain SL1344; DSM 24522) were grown overnight at 37 °C under  
249 aerobic conditions in Luria Bertani (LB) broth. Cultures were then spun down by centrifugation and  
250 resuspended in LB broth to reach the appropriate colony forming units (CFU) for gavage. BALB/c  
251 mice were infected with 10<sup>9</sup> CFUs of *L. monocytogenes* and C57BL/6 mice were infected with 10<sup>8</sup>  
252 CFUs of *S. typhimurium*. Fecal CFU enumeration was performed as described previously (4) with  
253 the modification of the selective media which differed based on the strain. Tissue was processed in  
254 the same manner, except that the homogenization was performed using a tissue grinder. *L.*

255 *monocytogenes* was plated on Oxford agar plates, while *S. typhimurium* was plated on streptomycin-  
256 containing (50 µg/ml) LB agar plates.

257 **Mouse disease scoring.** A project specific scoring system based on the FELASA guidelines for  
258 reporting clinical signs in laboratory animals (23) was used to determine mouse disease score. This  
259 scoring system is shown in **Table 1**.

260 **Lipocalin ELISA.** Samples for the Lipocalin ELISA were prepared as described previously (4) and  
261 measured using the Mouse Lipocalin-2/NGAL DuoSet Elisa R&D Systems (Biotechne, Minneapolis,  
262 United States) according to the manufacturer's instructions.

263 **Detection of bacterial glycan-degrading enzyme activities.** Enzymatic activities of sulfatase,  $\alpha$ -  
264 fucosidase,  $\beta$ -*N*-acetyl-glucosaminidase and  $\beta$ -glucosidase were determined using *p*-nitrophenyl  
265 glycoside-based enzyme assays from fecal samples as described previously (24).

266

## 267 REFERENCES

- 268 1. Martens EC, Neumann M, Desai MS. 2018. Interactions of commensal and pathogenic  
269 microorganisms with the intestinal mucosal barrier. *Nat Rev Microbiol* 16:457–470.
- 270 2. Makki K, Deehan EC, Walter J, Bäckhed F. 2018. The Impact of Dietary Fiber on Gut  
271 Microbiota in Host Health and Disease. *Cell Host Microbe* 23:705–715.
- 272 3. European Food Safety Authority. 2010. Scientific Opinion on Dietary Reference Values for  
273 carbohydrates and dietary fibre. *EFSA J* 8:1–77.
- 274 4. Desai MS, Seekatz AM, Koropatkin NM, Kamada N, Hickey CA, Wolter M, Pudlo NA,  
275 Kitamoto S, Terrapon N, Muller A, Young VB, Henrissat B, Wilmes P, Stappenbeck TS,  
276 Núñez G, Martens EC. 2016. A Dietary Fiber-Deprived Gut Microbiota Degrades the Colonic  
277 Mucus Barrier and Enhances Pathogen Susceptibility. *Cell* 167:1339-1353.e21.
- 278 5. Collins JW, Keeney KM, Crepin VF, Rathinam VA, Fitzgerald KA, Finlay BB, Frankel G.

- 279 2014. *Citrobacter rodentium*: Infection, inflammation and the microbiota. *Nat Rev Microbiol*.
- 280 6. de Noordhout CM, Devleeschauwer B, Angulo FJ, Verbeke G, Haagsma J, Kirk M, Havelaar  
281 A, Speybroeck N. 2014. The global burden of listeriosis: A systematic review and meta-  
282 analysis. *Lancet Infect Dis* 14:1073–1082.
- 283 7. GBD 2017 Non-Typhoidal Salmonella Invasive Disease Collaborators JD, Parisi A, Sarkar K,  
284 Blacker BF, Reiner RC, Hay SI, Nixon MR, Dolecek C, James SL, Mokdad AH, Abebe G,  
285 Ahmadian E, Alahdab F, Alemnew BTT, Alipour V, Bakeshei FA, Animut MD, Ansari F,  
286 Arabloo J, Asfaw ET, Bagherzadeh M, Bassat Q, Belayneh YMM, Carvalho F, Daryani A,  
287 Demeke FM, Demis ABB, Dubey M, Duken EE, Dunachie SJ, Eftekhari A, Fernandes E, Fard  
288 RF, Gedefaw GA, Geta B, Gibney KB, Hasanzadeh A, Hoang CL, Kasaeian A, Khater A,  
289 Kidanemariam ZT, Lakew AM, Malekzadeh R, Melese A, Mengistu DT, Mestrovic T,  
290 Miazgowski B, Mohammad KA, Mohammadian M, Mohammadian-Hafshejani A, Nguyen  
291 CT, Nguyen LH, Nguyen SH, Nirayo YL, Olagunju AT, Olagunju TO, Pourjafar H, Qorbani  
292 M, Rabiee M, Rabiee N, Rafay A, Rezapour A, Samy AM, Sepanlou SG, Shaikh MA, Sharif  
293 M, Shigematsu M, Tessema B, Tran BX, Ullah I, Yimer EM, Zaidi Z, Murray CJL, Crump JA.  
294 2019. The global burden of non-typhoidal salmonella invasive disease: a systematic analysis  
295 for the Global Burden of Disease Study 2017. *Lancet Infect Dis* 19:1312–1324.
- 296 8. Zhang T, Sasabe J, Hullahalli K, Sit B, Waldor MK. 2021. Increased *Listeria monocytogenes*  
297 Dissemination and Altered Population Dynamics in *Muc2*-Deficient Mice. *Infect Immun* 89.
- 298 9. Zarepour M, Bhullar K, Montero M, Ma C, Huang T, Velcich A, Xia L, Vallance BA. 2013.  
299 The mucin *Muc2* limits pathogen burdens and epithelial barrier dysfunction during *Salmonella*  
300 *enterica* serovar Typhimurium colitis. *Infect Immun* 81:3672–83.
- 301 10. Bergstrom KSB, Kisson-Singh V, Gibson DL, Ma C, Montero M, Sham HP, Ryz N, Huang  
302 T, Velcich A, Finlay BB, Chadee K, Vallance BA. 2010. *Muc2* protects against lethal  
303 infectious colitis by disassociating pathogenic and commensal bacteria from the colonic

- 304 mucosa. PLoS Pathog 6:e1000902.
- 305 11. Becattini S, Littmann ER, Carter RA, Kim SG, Morjaria SM, Ling L, Gyaltsen Y, Fontana  
306 E, Taur Y, Leiner IM, Pamer EG. 2017. Commensal microbes provide first line defense against  
307 *Listeria monocytogenes* infection. J Exp Med 214:1973–1989.
- 308 12. Barthel M, Hapfelmeier S, Quintanilla-Martínez L, Kremer M, Rohde M, Hogardt M, Pfeffer  
309 K, Rüssmann H, Hardt WD. 2003. Pretreatment of mice with streptomycin provides a  
310 *Salmonella enterica* serovar Typhimurium colitis model that allows analysis of both pathogen  
311 and host. Infect Immun 71:2839–2858.
- 312 13. Wotzka SY, Kreuzer M, Maier L, Arnoldini M, Nguyen BD, Brachmann AO, Berthold DL,  
313 Zünd M, Hausmann A, Bakkeren E, Hoces D, Gül E, Beutler M, Dolowschiak T, Zimmermann  
314 M, Fuhrer T, Moor K, Sauer U, Typas A, Piel J, Diard M, Macpherson AJ, Stecher B,  
315 Sunagawa S, Slack E, Hardt W-D. 2019. *Escherichia coli* limits *Salmonella* Typhimurium  
316 infections after diet shifts and fat-mediated microbiota perturbation in mice. Nat Microbiol  
317 <https://doi.org/10.1038/s41564-019-0568-5>.
- 318 14. Rolhion N, Chassaing B, Nahori MA, de Bodt J, Moura A, Lecuit M, Dussurget O, Bérard M,  
319 Marzorati M, Fehlner-Peach H, Littman DR, Gewirtz AT, Van de Wiele T, Cossart P. 2019.  
320 A *Listeria monocytogenes* Bacteriocin Can Target the Commensal *Prevotella copri* and  
321 Modulate Intestinal Infection. Cell Host Microbe 26:691-701.e5.
- 322 15. Steimle A, De Sciscio A, Neumann M, Grant ET, Pereira G V., Martens EC, Desai MS. 2021.  
323 Constructing a gnotobiotic mouse model with a synthetic human gut microbiome to study  
324 host–microbe crosstalk. STAR Protoc ,in press.
- 325 16. Chassaing B, Srinivasan G, Delgado MA, Young AN, Gewirtz AT, Vijay-Kumar M. 2012.  
326 Fecal Lipocalin 2, a Sensitive and Broadly Dynamic Non-Invasive Biomarker for Intestinal  
327 Inflammation. PLoS One 7:e44328.
- 328 17. Radoshevich L, Cossart P. 2018. *Listeria monocytogenes*: Towards a complete picture of its

- 329 physiology and pathogenesis. *Nat Rev Microbiol* 16:32–46.
- 330 18. Ebersbach T, Jørgensen JB, Heegaard PM, Lahtinen SJ, Ouwehand AC, Poulsen M, Frøkiær  
331 H, Licht TR. 2010. Certain dietary carbohydrates promote *Listeria* infection in a guinea pig  
332 model, while others prevent it. *Int J Food Microbiol* 140:218–224.
- 333 19. Ten Bruggencate SJM, Bovee-Oudenhoven IMJ, Lettink-Wissink MLG, Katan MB, Van Der  
334 Meer R. 2004. Dietary fructo-oligosaccharides and inulin decrease resistance of rats to  
335 salmonella: Protective role of calcium. *Gut* 53:530–535.
- 336 20. Petersen A, Heegaard PM, Pedersen AL, Andersen JB, Sørensen RB, Frøkiær H, Lahtinen SJ,  
337 Ouwehand AC, Poulsen M, Licht TR. 2009. Some putative prebiotics increase the severity of  
338 *Salmonella enterica* serovar Typhimurium infection in mice. *BMC Microbiol* 9:245.
- 339 21. Martín R, Bermúdez-Humarán LG, Langella P. 2016. Gnotobiotic Rodents: An In Vivo Model  
340 for the Study of Microbe-Microbe Interactions. *Front Microbiol* 7:409.
- 341 22. Herp S, Brugiroux S, Garzetti D, Ring D, Jochum LM, Beutler M, Eberl C, Hussain S, Walter  
342 S, Gerlach RG, Ruscheweyh HJ, Huson D, Sellin ME, Slack E, Hanson B, Loy A, Baines JF,  
343 Rausch P, Basic M, Bleich A, Berry D, Stecher B. 2019. *Mucispirillum schaedleri* Antagonizes  
344 *Salmonella* Virulence to Protect Mice against Colitis. *Cell Host Microbe* 25:681-694.e8.
- 345 23. Fentener van Vlissingen JM, Borrens M, Girod A, Lelovas P, Morrison F, Torres YS. 2015.  
346 The reporting of clinical signs in laboratory animals: FELASA Working Group Report. *Lab*  
347 *Anim* 49:267–83.
- 348 24. Steimle A, Grant ET, Desai MS. 2021. Quantitative assay to detect bacterial glycan-degrading  
349 enzyme activities in mouse and human fecal samples. *STAR Protoc* 2:100326.

350

## 351 **ACKNOWLEDGMENTS**

352 This work was supported by the Luxembourg National Research Fund (FNR) CORE grants  
353 (C15/BM/10318186 and C18/BM/12585940) to M.S.D.



354

355 We thank Pascale Cossart and Olivier Dussurget from the Pasteur Institute in Paris for their support  
356 and for providing us with the *Listeria monocytogenes* strain used in this work.

357

358 The authors declare no competing interests.

359

360 M.W., J.Z., and M.S.D. designed the study; M.W. and A.S. performed the experiments; M.W. and  
361 M.S.D. wrote the original manuscript draft; M.W., A.S., J.Z., and M.S.D. reviewed and edited the  
362 manuscript.

363

## 364 **FIGURE LEGENDS**

365 **FIG 1** Fiber-deprivation increases abundance and activity of mucin-degrading gut bacteria in both  
366 BALB/c and C57BL/6 mice. (A) Experimental timeline. Half of the 6–10 weeks old, age matched  
367 GF BALB/c and C57BL/6 mice were gavaged with the 14SM gut microbiota on two consecutive  
368 days while the other half was maintained GF. Six days after the gavage, half of the mice from the GF  
369 and 14SM groups continued on the FR diet, while the other half were switched to the FF diet. The  
370 mice were maintained on their respective diets for 20 days and then BALB/c mice were infected with  
371 *L. monocytogenes* and C57BL/6 mice were infected with *S. typhimurium* after which the mice were  
372 observed for another 10 days. (B) Relative bacterial abundance before infection, determined by qPCR  
373 on DNA extracted from fecal pellets. While some low abundant bacteria might not be visible in the  
374 figure, the presence of all 14 bacteria was detected. (C) Combined relative abundances of four mucin-  
375 degrading bacteria *A. muciniphila*, *B. caccae*, *B. intestihominis* and *B. thetaiotaomicron* using the  
376 same data from panel B. Tukey box plot, Mann–Whitney test. (D) Glycan-degrading enzyme activity  
377 of the gut microbiome determined by stool-based *p*-nitrophenyl glycoside-based enzyme assays.  
378 Sulfatase (SULF),  $\alpha$ -fucosidase (FUC) and  $\beta$ -N-acetyl-glucosaminidase (NAG) are key mucin-

379 degrading enzymes, while  $\beta$ -glucosidase (GLUC) serves as a control for general glycan-degrading  
380 activity. Tukey box plot. Wilcoxon Rank Sum Test. (E) Fecal LCN-2 levels determined by ELISA  
381 on the day before the pathogen infection. Error bars represent SEM. Unpaired, two-tailed, t-test.  
382 BALB/c: n=5 mice/group. C57BL/6: GF FR group, n=7/group; other groups, n=8/group. Green: FR-  
383 fed mice; Red: FF-fed mice. ns, non-significant; \* $p$ <0.05; \*\* $p$ <0.01; \*\*\* $p$ <0.001; \*\*\*\* $p$ <0.0001.

384

385 **FIG 2** Fiber deprivation protects against *L. monocytogenes* and *S. typhimurium* in a microbiome-  
386 independent manner. (A) Survival curve of enteropathogen-infected mice. Log-rank test between  
387 both diets of GF or 14SM groups respectively. (B) Weight change of the enteropathogen-infected  
388 mice. Day 0 value was determined immediately before the gavage. Error bars represent SEM.  
389 Unpaired, two-tailed t-test between both diets of GF (bottom significance labels) or 14SM group (top  
390 significance labels); comparisons are not significant when the significance is not displayed. (C)  
391 Average disease score attributed to each enteropathogen-infected group. Day 0 value was determined  
392 immediately before the gavage. Error bars represent SEM. Mann–Whitney test between both diets of  
393 GF (top significance labels) or 14SM group (bottom significance labels); comparisons are not  
394 significant when the significance is not displayed. (D) Fecal *L. monocytogenes* load of BALB/c mice  
395 during the 10 days of infection. Depending on the sampling day, 1-5 samples per group were obtained  
396 and evaluated. Fecal *S. typhimurium* load in C57BL/6 mice could not be determined, as the mice did  
397 not consistently provide fecal material due to the severe disease. Tukey box plot; unpaired, two-tailed  
398 t-test. (E) Pathogen loads of liver and spleen tissues on the day each mouse was euthanized. Samples  
399 below the measurable threshold of  $10^4$  CFU (dotted black line) were considered as  $10^4$ . Tukey box  
400 plot; unpaired, two-tailed t-test. BALB/c: n=5 mice/group. C57BL/6: GF FR group, n=7/group; other  
401 groups, n=8/group. Green, FR-fed mice; Red, FF-fed mice; unbroken lines, 14SM mice; dotted lines,  
402 GF mice. ns, non-significant; \* $p$ <0.05; \*\* $p$ <0.01; \*\*\* $p$ <0.001; \*\*\*\* $p$ <0.0001.

403

404 **Table 1** Scoring system used to determine disease severity of mice. Mice reaching the humane  
 405 endpoint (HEP) were scored as maximum score of 6.

| Category                                                                 | Score |
|--------------------------------------------------------------------------|-------|
| <b>Body weight</b>                                                       |       |
| 5–10% weight loss                                                        | 1     |
| 11–15% weight loss                                                       | 2     |
| 16–20% weight loss                                                       | 3     |
| ≥20% weight loss                                                         | HEP   |
| Pinched skin/dehydration                                                 | 4     |
| <b>Coat condition</b>                                                    |       |
| Coat slightly unkempt                                                    | 1     |
| Slight piloerection                                                      | 2     |
| Marked piloerection                                                      | 4     |
| <b>Body function</b>                                                     |       |
| Tachypnoea                                                               | 3     |
| Dyspnoea                                                                 | 5     |
| <b>Environment</b>                                                       |       |
| Loose stools or diarrhoea                                                | 1     |
| Blood in diarrhoea                                                       | HEP   |
| <b>Behaviours</b>                                                        |       |
| Tense and nervous on handling                                            | 3     |
| Markedly distressed on handling,<br>e.g. shaking, vocalizing, aggressive | 4     |
| <b>Locomotion</b>                                                        |       |
| Slightly abnormal gait/posture                                           | 1     |
| Markedly abnormal gait/posture                                           | 4     |
| Significant mobility problems<br>or reluctance to move                   | HEP   |
| <b>Procedure-specific indicators</b>                                     |       |
| Conjunctivitis                                                           | 4     |
| <b>Implementation of humane endpoint (HEP)</b>                           |       |
| Total score                                                              | ≥ 6   |

406

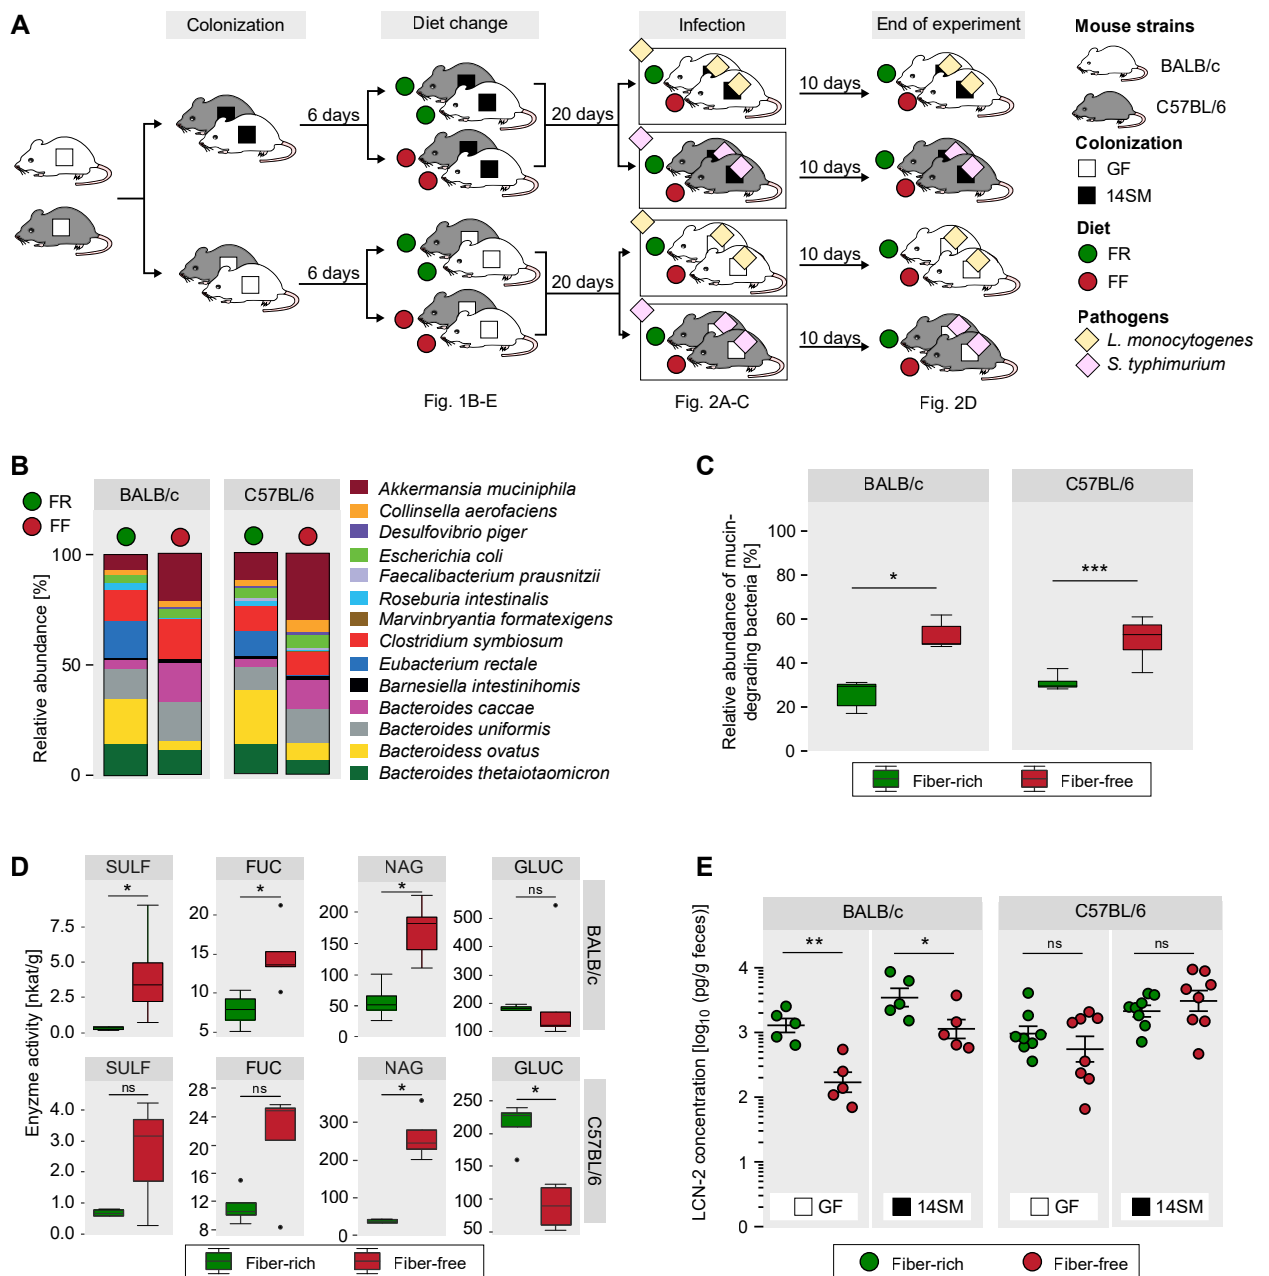

**FIG 1** Fiber-deprivation increases abundance and activity of mucin-degrading gut bacteria in both BALB/c and C57BL/6 mice. (A) Experimental timeline. Half of the 6–10 weeks old, age matched GF BALB/c and C57BL/6 mice were gavaged with the 14SM gut microbiota on two consecutive days while the other half was maintained GF. Six days after the gavage, half of the mice from the GF and 14SM groups continued on the FR diet, while the other half were switched to the FF diet. The mice were maintained on their respective diets for 20 days and then BALB/c mice were infected with *L. monocytogenes* and C57BL/6 mice were infected with *S. typhimurium* after which the mice were observed for another 10 days. (B) Relative bacterial abundance before infection, determined by qPCR on DNA extracted from fecal pellets. While some low abundant bacteria might not be visible in the figure, the presence of all 14 bacteria was detected. (C) Combined relative abundances of four mucin-degrading bacteria *A. muciniphila*, *B. caccae*, *B. intestinhominis* and *B. thetaiotaomicron* using the same data from panel B. Tukey box plot, Mann–Whitney test. (D) Glycan-degrading enzyme activity of the gut microbiome determined by stool-based p-nitrophenyl glycoside-based enzyme assays. Sulfatase (SULF),  $\alpha$ -fucosidase (FUC) and  $\beta$ -N-acetyl-glucosaminidase (NAG) are key mucin-degrading enzymes, while  $\beta$ -glucosidase (GLUC) serves as a control for general glycan-degrading activity. Tukey box plot. Wilcoxon Rank Sum Test. (E) Fecal LCN-2 levels determined by ELISA on the day before the pathogen infection. Error bars represent SEM. Unpaired, two-tailed, t-test. BALB/c: n=5 mice/group. C57BL/6: GF FR group, n=7/group; other groups, n=8/group. Green: FR-fed mice; Red: FF-fed mice. ns, non-significant; \* $p < 0.05$ ; \*\* $p < 0.01$ ; \*\*\* $p < 0.001$ ; \*\*\*\* $p < 0.0001$ .

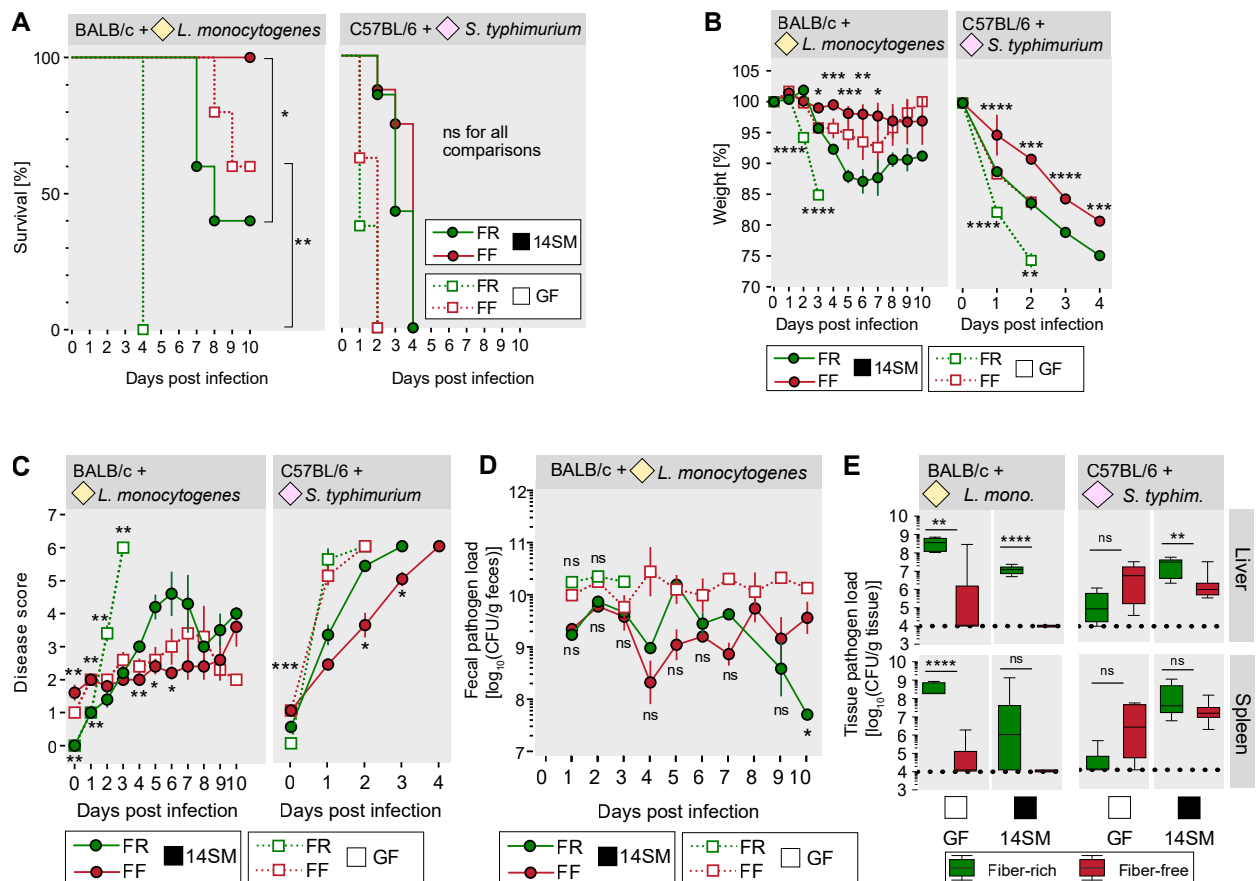

**FIG 2** Fiber deprivation protects against *L. monocytogenes* and *S. typhimurium* in a microbiome-independent manner. (A) Survival curve of enteropathogen-infected mice. Log-rank test between both diets of GF or 14SM groups respectively. (B) Weight change of the enteropathogen-infected mice. Day 0 value was determined immediately before the gavage. Error bars represent SEM. Unpaired, two-tailed t-test between both diets of GF (bottom significance labels) or 14SM group (top significance labels); comparisons are not significant when the significance is not displayed. (C) Average disease score attributed to each enteropathogen-infected group. Day 0 value was determined immediately before the gavage. Error bars represent SEM. Mann–Whitney test between both diets of GF (top significance labels) or 14SM group (bottom significance labels); comparisons are not significant when the significance is not displayed. (D) Fecal *L. monocytogenes* load of BALB/c mice during the 10 days of infection. Depending on the sampling day, 1-5 samples per group were obtained and evaluated. Fecal *S. typhimurium* load in C57BL/6 mice could not be determined, as the mice did not consistently provide fecal material due to the severe disease. Tukey box plot; unpaired, two-tailed t-test. (E) Pathogen loads of liver and spleen tissues on the day each mouse was euthanized. Samples below the measurable threshold of  $10^4$  CFU (dotted black line) were considered as  $10^4$ . Tukey box plot; unpaired, two-tailed t-test. BALB/c: n=5 mice/group. C57BL/6: GF FR group, n=7/group; other groups, n=8/group. Green, FR-fed mice; Red, FF-fed mice; unbroken lines, 14SM mice; dotted lines, GF mice. ns, non-significant; \* $p < 0.05$ ; \*\* $p < 0.01$ ; \*\*\* $p < 0.001$ ; \*\*\*\* $p < 0.0001$ .
